# Supplementary material
Source: publisher figshare collection journal article supplement (https://karger.figshare.com/ndownloader/files/24262178)
Supplement: Supplementary file 1 [file 24262178]

**Supplementary Information**

**Diverse receptor tyrosine kinase phosphorylation in urine-derived tubular epithelial cells from autosomal dominant polycystic kidney disease patients**

Kisho Ikeda1, Tetsuro Kusaba1, *, Aya Tomita1, Tomoharu Ida1, Noriko Watanabe-Uehara1, Takashi Kitani1, Noriyuki Yamashita1, Masahiro Uehara1, Satoaki Matoba2, Tadaaki Yamada3 and Keiichi Tamagaki1

**Supplementary Table 1. Primer list for RT-PCR.**

| Gene | Forward | Reverse |
| --- | --- | --- |
| *nphs1* | ACCAAATCCTCCGGCTTAGG | CAACCTTTACGCAGAACCAGA |
| *lrp2* | GTTCAGATGACGCGGATGAAA | TCACAGTCTTGATCTTGGTCACA |
| *umod* | TGTTGACGAGGAATGAAACCC | TGAGGTCACGGATGATGATCTC |
| *slc12a3* | CCTGGGTGGAGACCTTCATTC | GAGCCCCAATTTACCTCTGGC |
| *scnn1a* | AGGGGAACAAGCGTGAGGA | GGTGGAACTCGATCAGGGC |
| *aqp2* | CTCCCTCCTCTACAACTACGTG | CTCCTCCCAATCGGTGTCC |
| *keratin18* | GTTGACCGTGGAGGTAGATGC | GAGCCAGCTCGTCATATTGGG |
| *upk1A* | GTGGTGGGCCTGCTAGTTG | TATACACGGTACTGGTCGGCT |
| *sv40* | GATGAAGACAGCCAGGAAAATG | CTGAAATGAGCCTTGGGACTG |
| *met* | AGCAATGGGGAGTGTAAAGAGG | CCCAGTCTTGTACTCAGCAAC |
| *gapdh* | TCCTCTGACTTCAACAGCGA | GGGTCTTACTCCTTGGAGGC |
